# Supplementary material
Source: PubMed Central journal article supplement (PMC7085811)

SUPPLEMENTARY DATA

Supplementary Figure 1. Glycemic control over time for those with and without difficulty paying bills

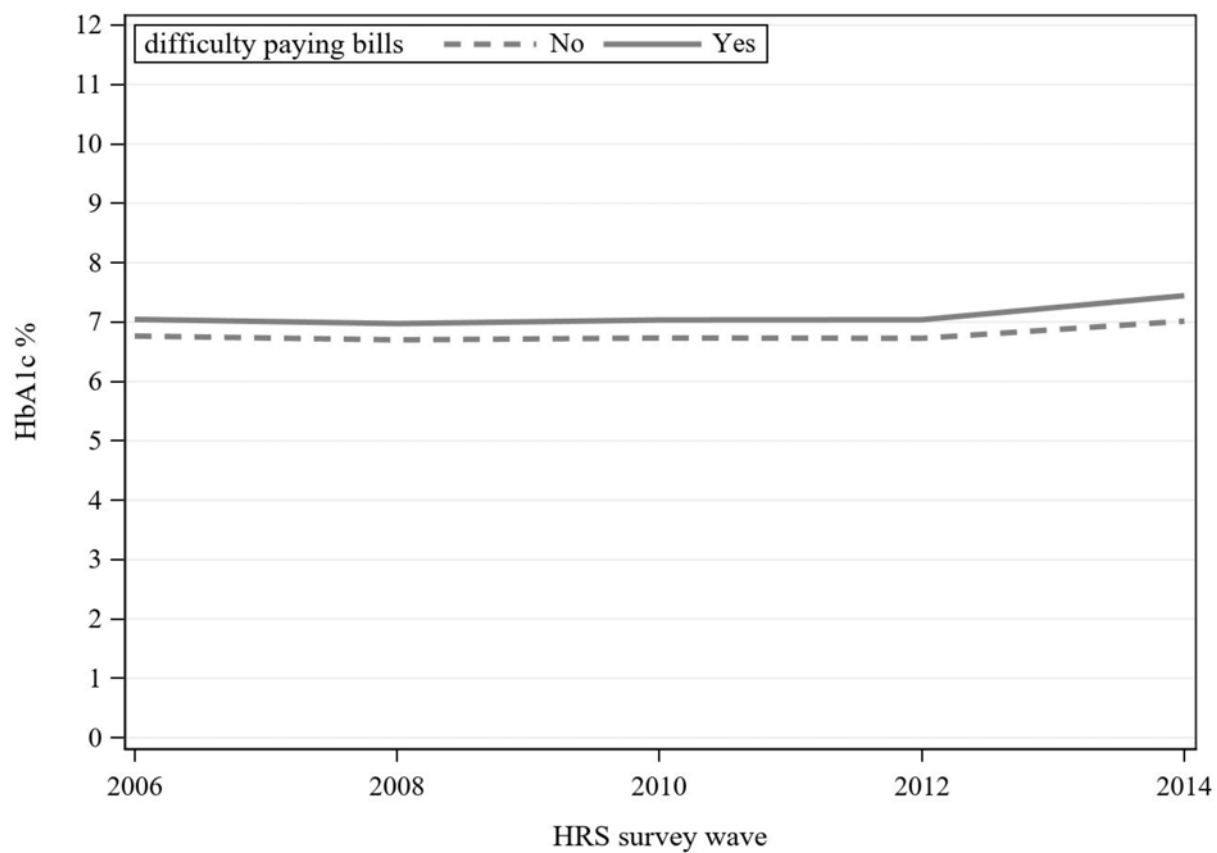

Supplement: DC191586SupplementaryData.pdf [file DC191586SupplementaryData.pdf]
